# Supplementary material
Source: PubMed Central journal article supplement (PMC7035398)
Supplement: 12250_2019_166_MOESM1_ESM.pdf [file 12250_2019_166_MOESM1_ESM.pdf]

## Electronic Supplementary Material

### Genetic and Phylogenetic Characterization of a Chikungunya Virus Imported into Shenzhen, China

Yang Yang<sup>1,2†</sup>, Zhixiang Xu<sup>1†</sup>, Haixia Zheng<sup>1†</sup>, Jingdong Song<sup>3</sup>, Ying Wu<sup>4</sup>, Zhou Tong<sup>1,2</sup>, Jing Yuan<sup>1</sup>, Gary Wong<sup>5,6</sup>, William J. Liu<sup>3</sup>, Yuhai Bi<sup>1,2</sup>, Yingxia Liu<sup>1,7✉</sup>, George F Gao<sup>1,2,3,7✉</sup>

1. Shenzhen Key Laboratory of Pathogen and Immunity, Guangdong Key Laboratory for Diagnosis and Treatment of Emerging Infectious Diseases, State Key Discipline of Infectious Disease, Second Hospital Affiliated to Southern University of Science and Technology, Shenzhen Third People's Hospital, Shenzhen 518112, China
2. CAS Key Laboratory of Pathogenic Microbiology and Immunology, Collaborative Innovation Center for Diagnosis and Treatment of Infectious Disease, Institute of Microbiology, Center for Influenza Research and Early-warning (CASCIRE), Chinese Academy of Sciences, Beijing 100101, China
3. National Institute for Viral Disease Control and Prevention, Chinese Center for Disease Control and Prevention (China CDC), Beijing 102206, China
4. Institute of Medical Virology, School of Basic Medical Sciences, Wuhan University, Wuhan 430071, China
5. Institut Pasteur of Shanghai, Chinese Academy of Sciences, Shanghai 200031, China
6. Département de microbiologie-infectiologie et d'immunologie, Université Laval, Québec City G1V 0A6, Canada
7. University of Chinese Academy of Sciences Medical School, Chinese Academy of Sciences, Beijing 101408, China

Supporting information to DOI: 10.1007/s12250-019-00166-5

Table S1. Primers used for CHIKV genome amplification and sequencing

| Primers     | Sequences (5'-3')             | Length of PCR products |
|-------------|-------------------------------|------------------------|
| CHIKV-F1-F  | AGTTTCTTACTGCTCTACTCTGCAA     | 1134bp                 |
| CHIKV-F1-R  | TCAGCCCCACCAACAGCTTCTGT       |                        |
| CHIKV-F2-F  | TATGCGGTAACCCACCACGCAGA       | 1108bp                 |
| CHIKV-F2-R  | TCCACGTCGTAGACGTACTCGT        |                        |
| CHIKV-F3-F  | ACGAAAGAGAGTTCGTAAACA         | 1214bp                 |
| CHIKV-F3-R  | ACTGCCTATCATTTAGTTTTATC       |                        |
| CHIKV-F4-F  | ATGGCGGGCATCTGCAGTCACCA       | 1303bp                 |
| CHIKV-F4-R  | TTTGCGACTTCTCGATAGGCAGC       |                        |
| CHIKV-F5-F  | GCAAAAACAGTTATGTGCGGTAC       | 1428bp                 |
| CHIKV-F5-R  | TCAGAAGACAAGCTTTCGATTTC       |                        |
| CHIKV-F6-F  | ACAGCGGAGACGCGTGACACAGC       | 1541bp                 |
| CHIKV-F6-R  | GAACTTGAAGCGCGTACCTGTCG       |                        |
| CHIKV-F7-F  | ACATAGCCTCCTTTGATAAGAGC       | 1368bp                 |
| CHIKV-F7-R  | GCTCCGTGGTGCCAGTTGTAGTAC      |                        |
| CHIKV-F8-F  | CATCGATAACGCGACCTGGCCA        | 1211bp                 |
| CHIKV-F8-R  | ACCTTGCAGTTRTTAATCACTT        |                        |
| CHIKV-F9-F  | TTAATGTCACAACAGTCCGGCAA       | 1515bp                 |
| CHIKV-F9-R  | CAAATTGTCCTGGTCTTCCTGCG       |                        |
| CHIKV-F10-F | ACGGCGACCATGCCGTCACAGTT       | 893bp                  |
| CHIKV-F10-R | TTCATACCTAGTTGTCAAGTTAGTG     |                        |
| CHIKV-F11-F | TGAGATAGAAGTTGAAGGGAATT       | 798bp                  |
| CHIKV-F11-R | GAAATATTA AAAACAAAATAACATCTCC |                        |

Table S2. Genetic identities among imported isolates of CHIKV.

Excel file
